# Supplementary material for: Nanoparticles versus Dendritic Cells as Vehicles to Deliver mRNA Encoding Multiple Epitopes for Immunotherapy
Source: PubMed Central journal article supplement — Mol Ther Methods Clin Dev. 2019 Nov 11;16:50–62. doi: 10.1016/j.omtm.2019.10.015 (PMC6909218; doi:10.1016/j.omtm.2019.10.015), 2019-11-11
Supplement: mmc1.pdf [file mmc1.pdf]

**OMTM, Volume 16**

**Supplemental Information**

**Nanoparticles versus Dendritic Cells  
as Vehicles to Deliver mRNA Encoding  
Multiple Epitopes for Immunotherapy**

**Rebuma Firdessa-Fite and Rémi J. Creusot**

# **Nanoparticles versus dendritic cells as vehicles to deliver mRNA encoding multiple epitopes for immunotherapy**

Rebuma Firdessa-Fite and Rémi J. Creusot

Supplemental Figures

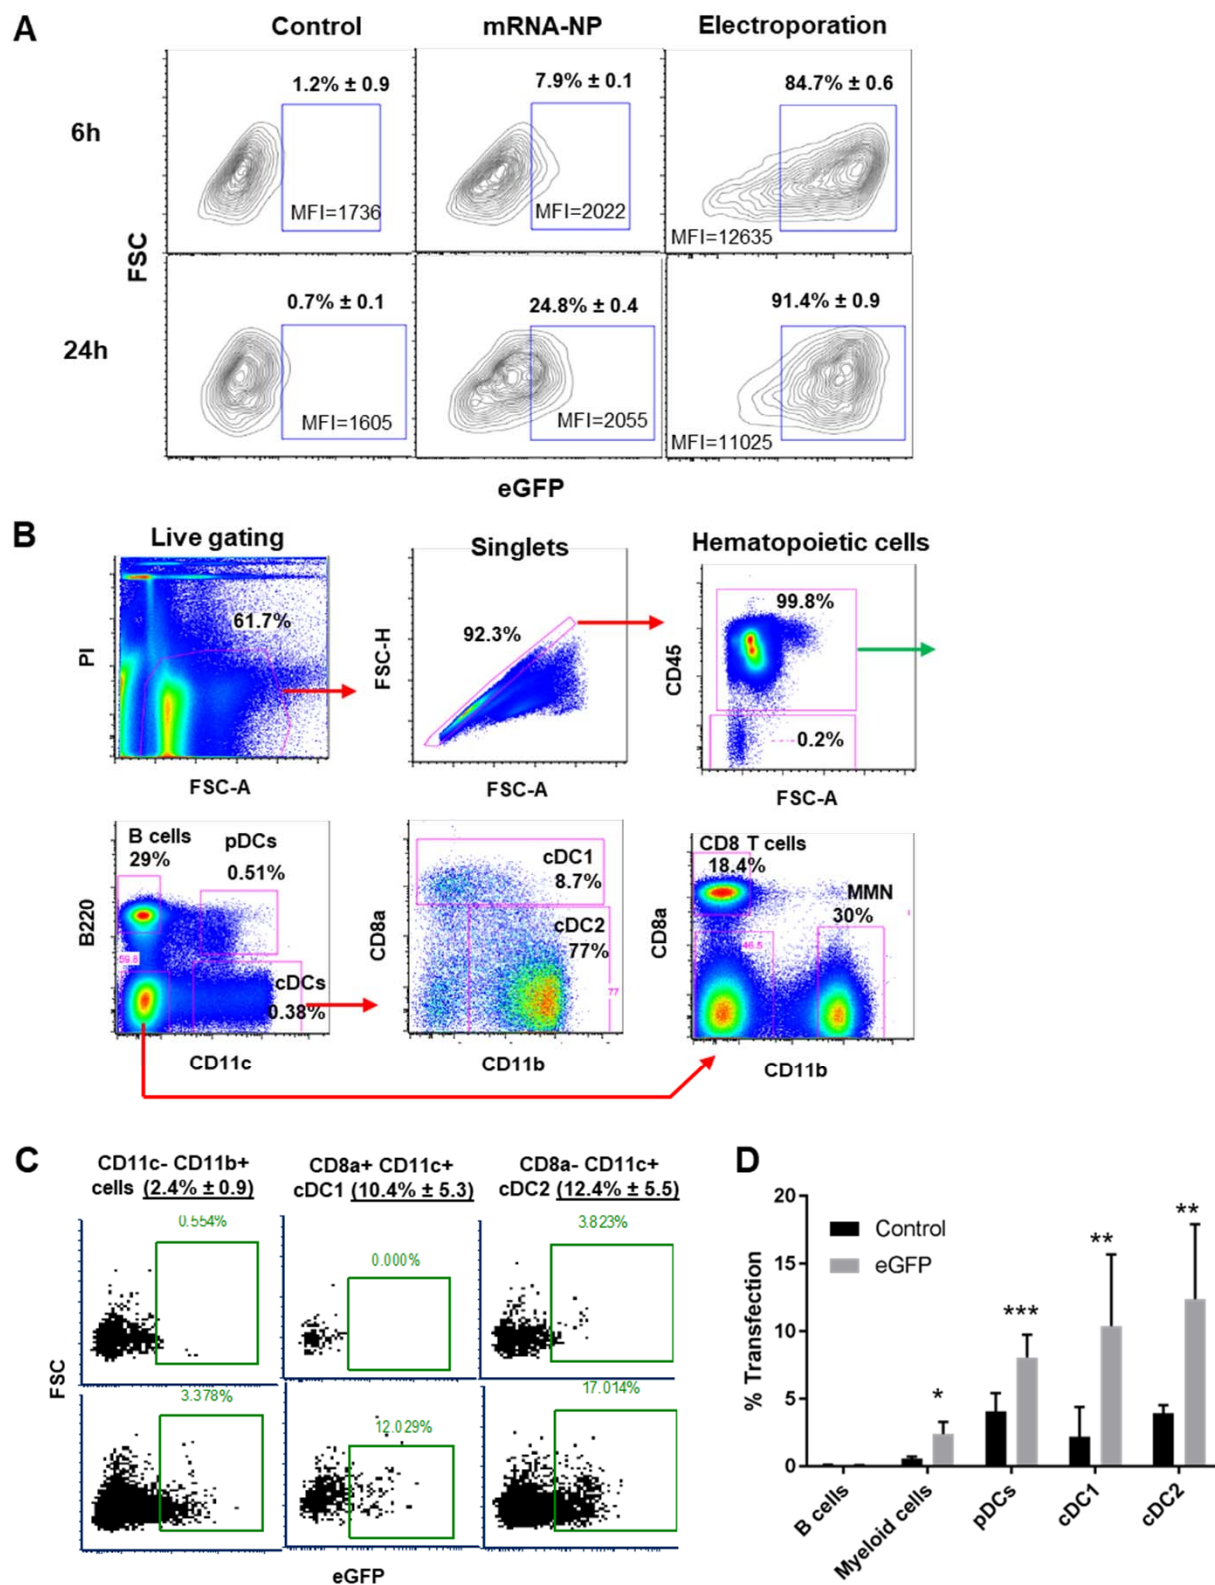

**Figure S1. In vitro mRNA-NP transfection efficiency in various antigen-presenting cells.** (A) In vitro transfection efficiency of mRNA-NPs in BM-DCs as compared to mRNA electroporation after 6h ( $p=0.0013$  for electroporation vs mRNA-NP) and 24h ( $p=0.0019$  for electroporation vs mRNA-NP). The mean fluorescence intensity of eGFP among mRNA-NP transfected cells is about 5-7 times lower than that of electroporated cells. (B) Gating strategy for analysis of mRNA-NP uptake and expression by both hematopoietic CD45+ cells and non-hematopoietic CD45- cells. MMN (Monocytes, macrophages or neutrophils) are within the B220- CD11c- CD8- CD11b+ cells. (C,D) In vitro transfection efficiency of mRNA-NPs in splenocytes, presented as representative dot plots (C) and bar graph (D). The cells were harvested 24h post-transfection with 0.1  $\mu\text{g}/\text{well}$  eGFP-encoding mRNA formulated as mRNA-NP. The bar graph shows the mean  $\pm$  SD from technical triplicates and the significant differences indicated are for B cells relative to other cell types in the eGFP-treated group.

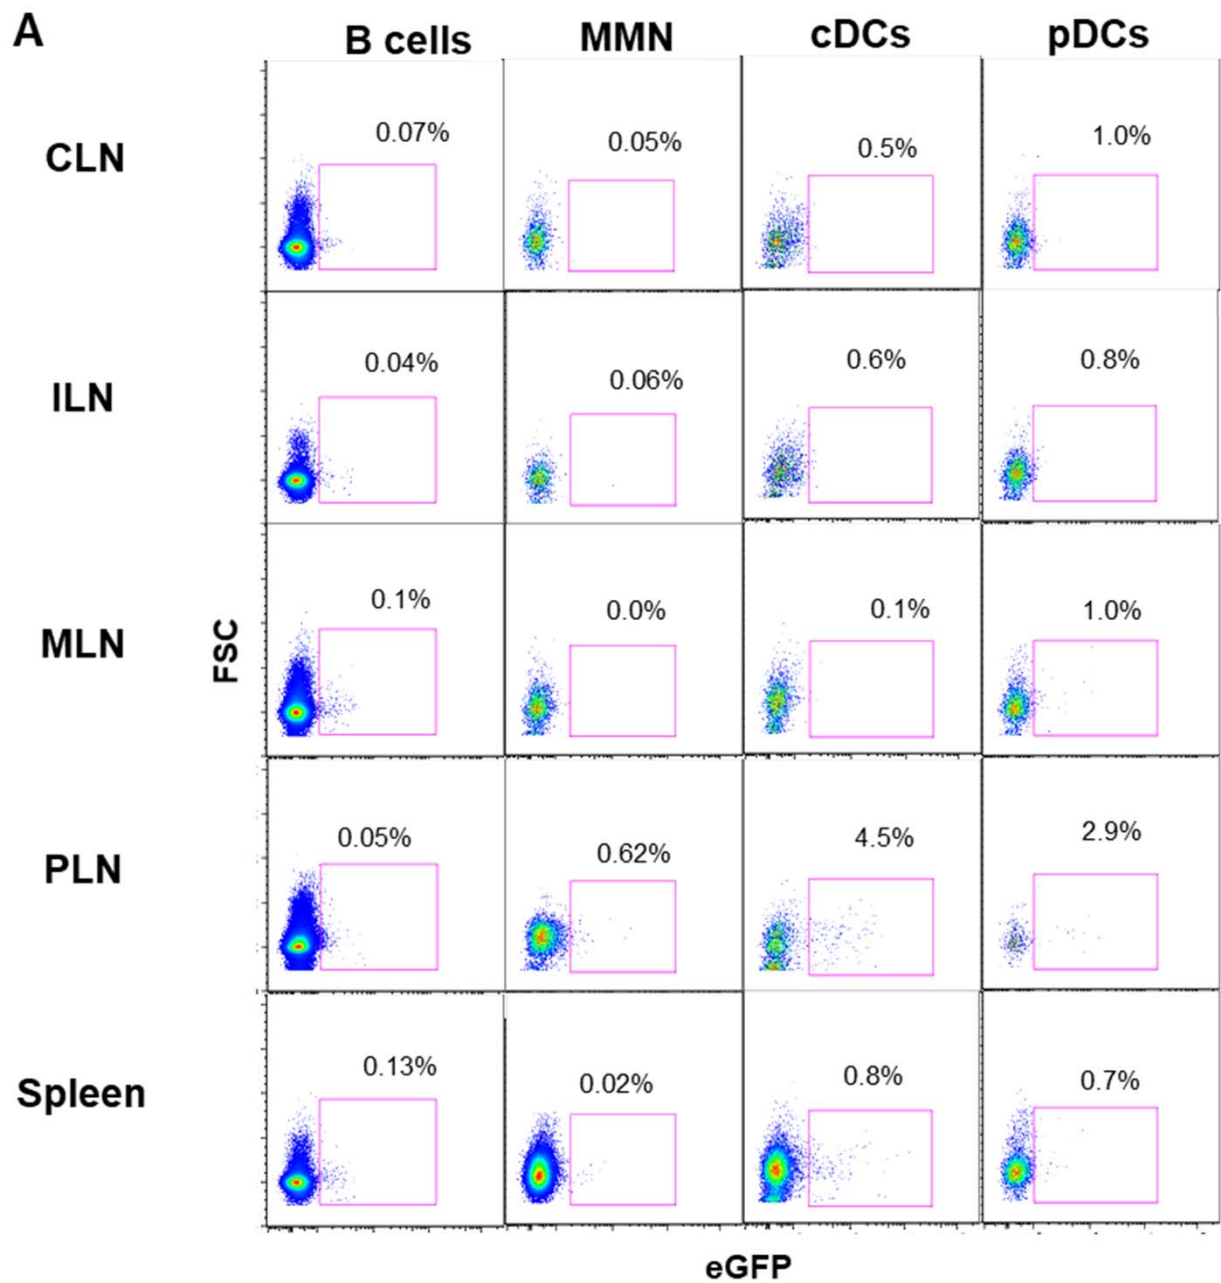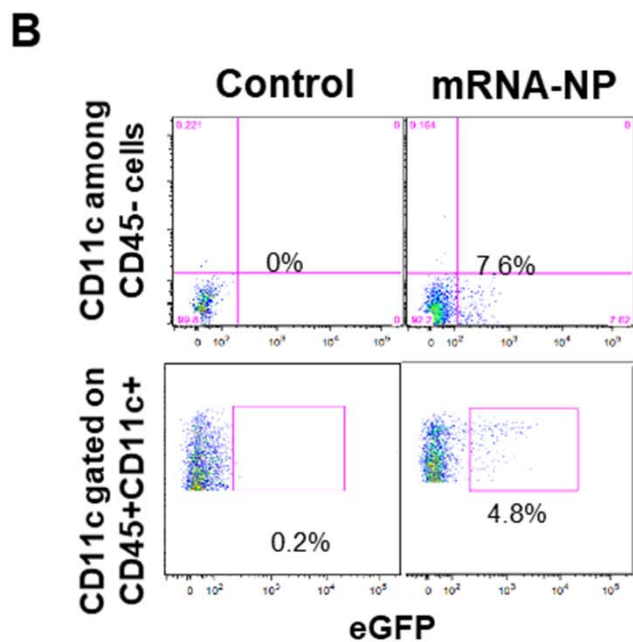

**Figure S2: In vivo mRNA-NP transfection efficiency in various antigen-presenting cells.** (A) In vivo transfection efficiency by eGFP mRNA-NPs in different APCs from various lymphoid tissues. (B) Expression of eGFP in both CD45+ CD11c+ cells and non-hematopoietic CD45- cells from PLN. MMN: monocytes / macrophages / neutrophils. For both experiments (A,B), mRNA-NPs were injected i.p. at a dose of 20 µg of mRNA eGFP/mouse and APC subsets were analyzed 48h later and data are presented as representative plots from three biological replicates.

### mRNA-NP

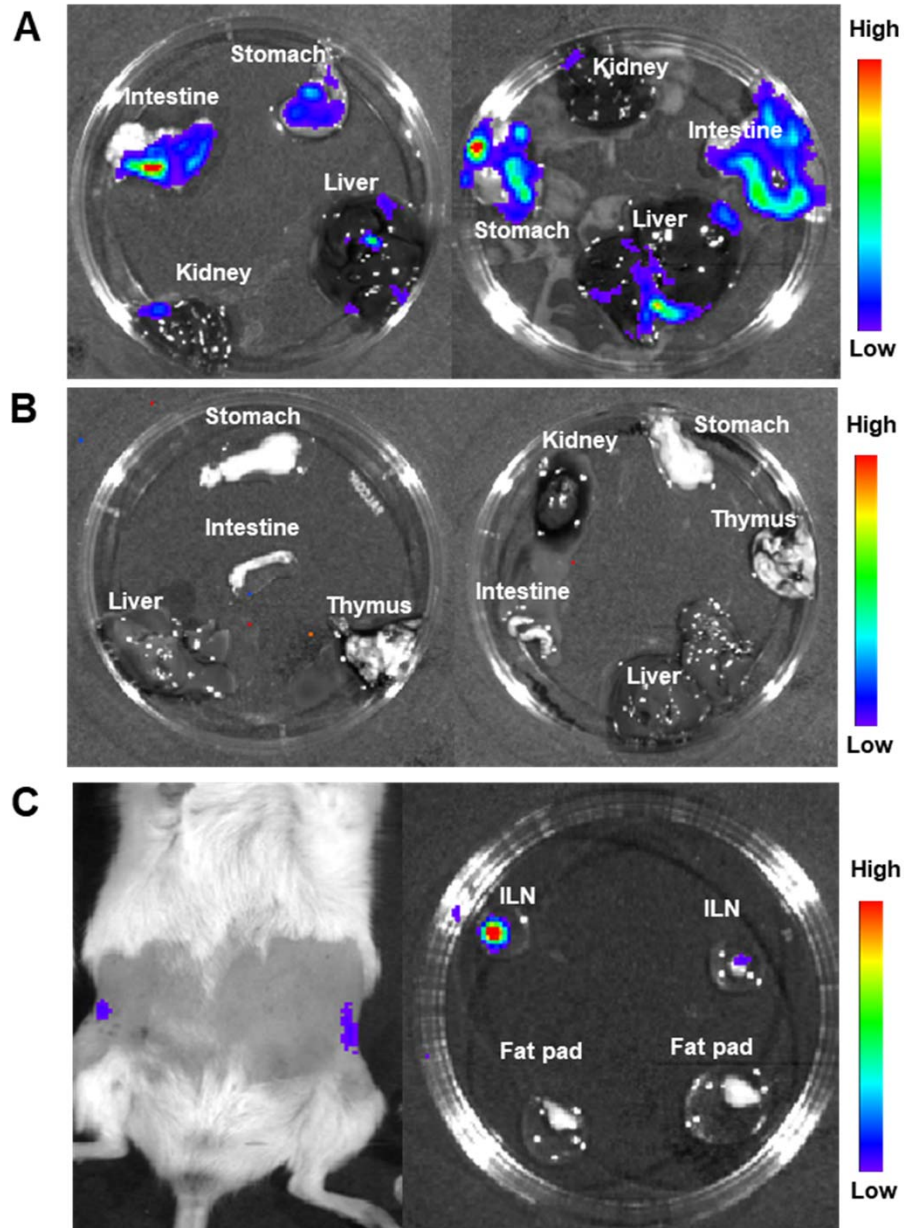

**Figure S3. In vivo expression of luciferase from mRNA-NP in various organs.** Luciferase signals 8h after i.p. (A), i.v. (B) and i.n. (C) administration. The data are representative of three biological replicates.

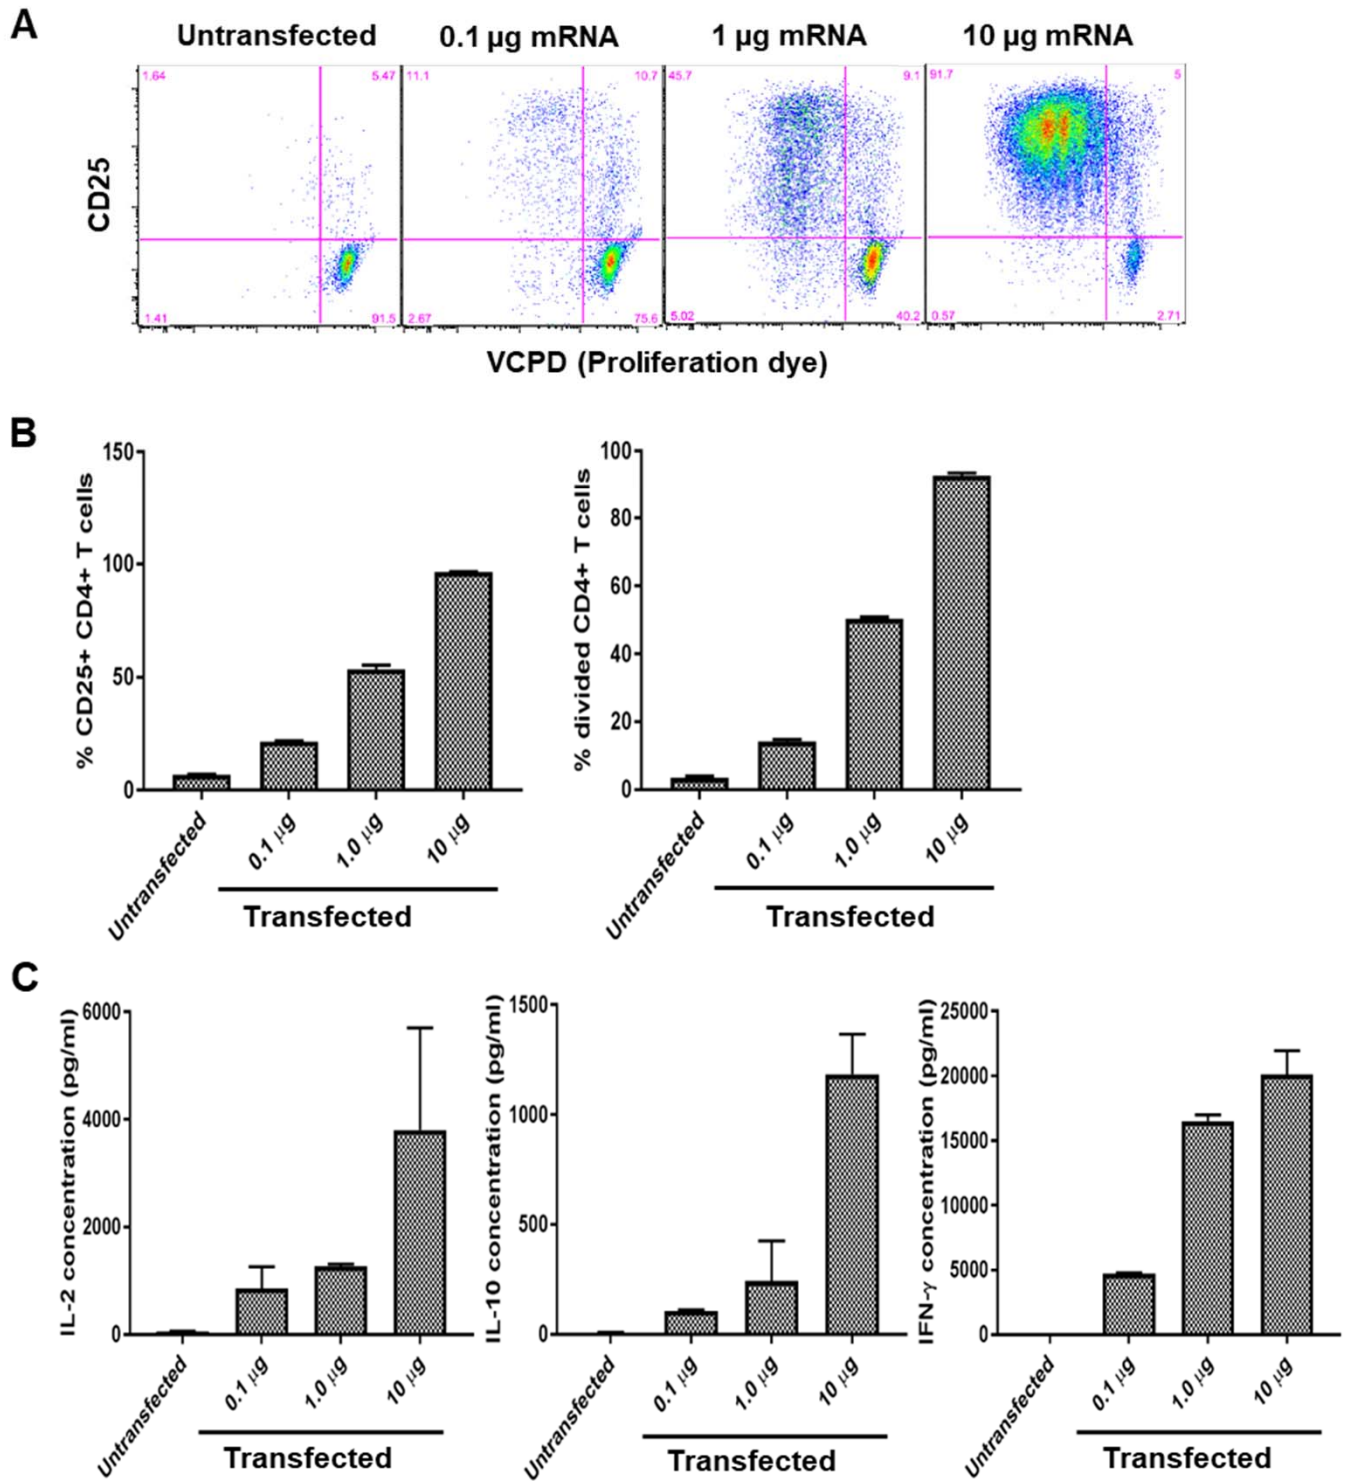

**Figure S4: Assessment of BDC2.5 CD4+ T-cell responses to antigen mRNA-NPs in vitro.** (A,B) Data show proliferation and CD25 upregulation by activated CD4+ T cells presented as representative plots (A) and bar graphs (B). (C) Cytokine secretion in culture supernatant from stimulated BDC2.5 CD4+ T cells. The bar graphs show the mean  $\pm$  SD from technical triplicates.

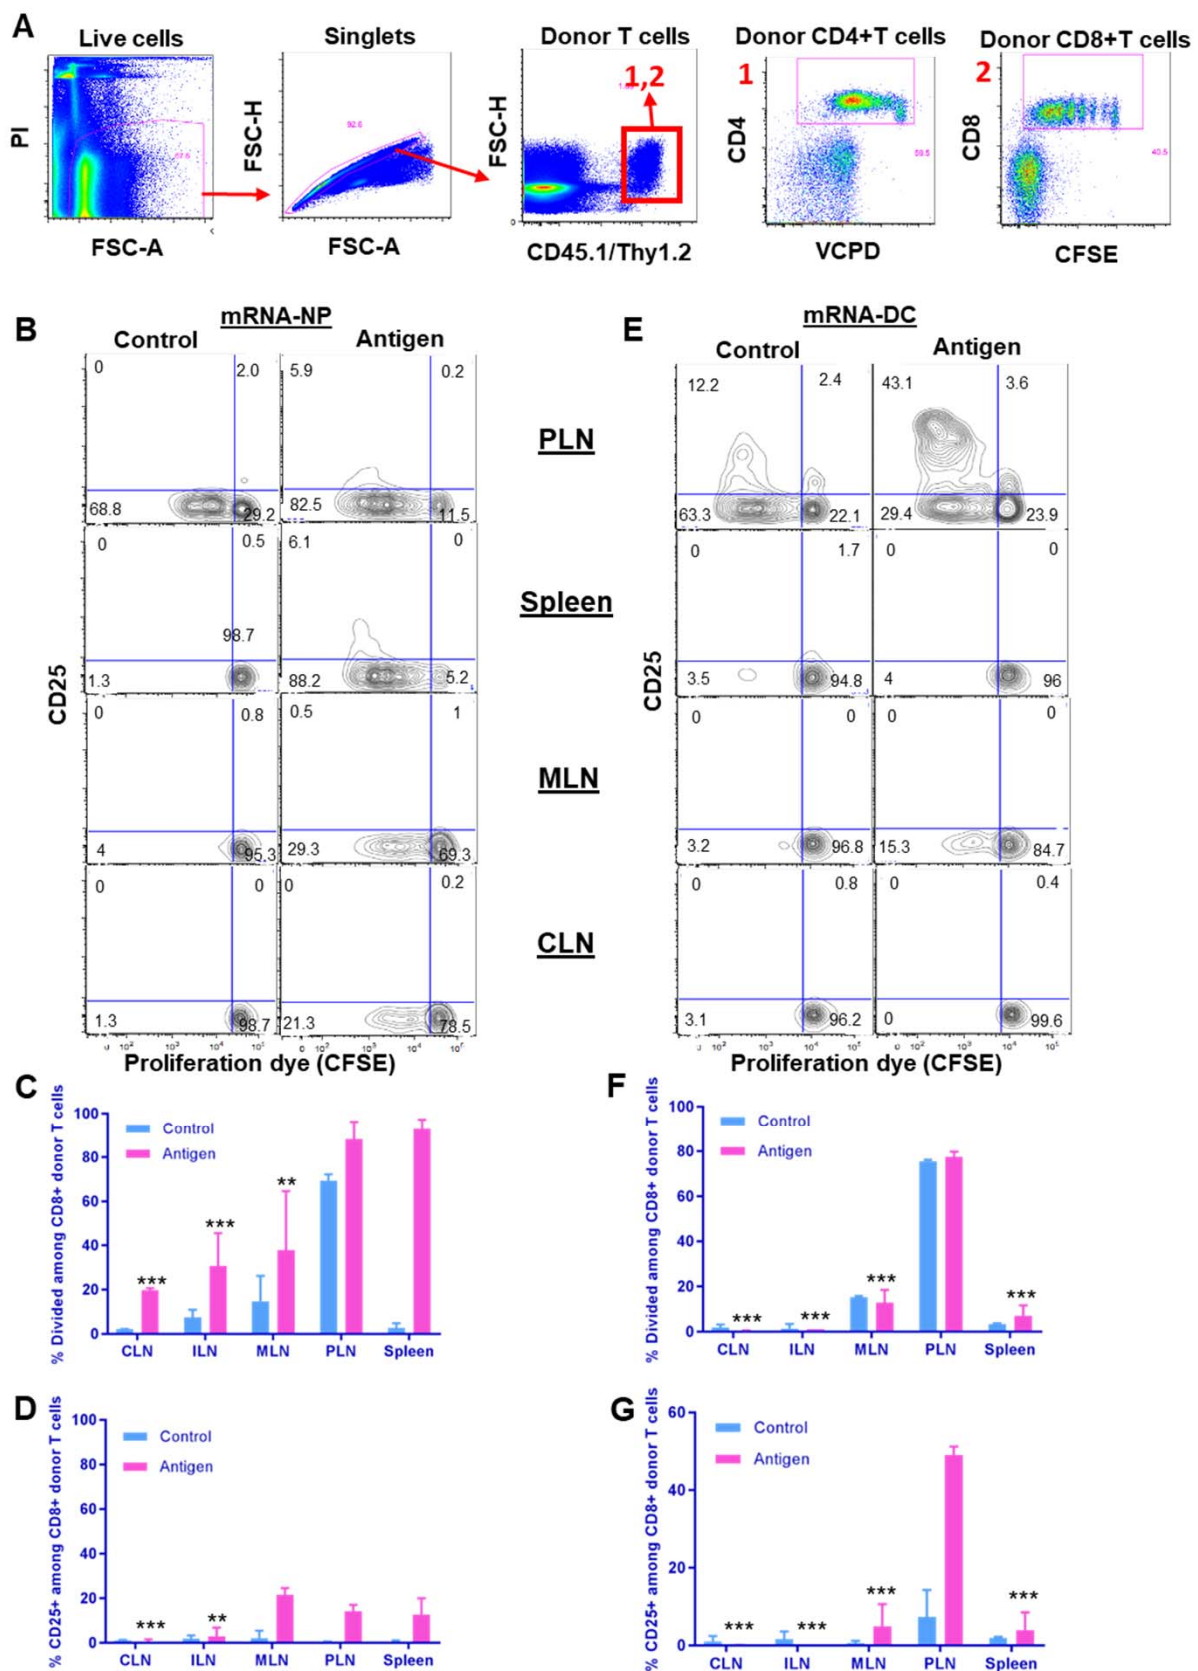

**Figure S5. Gating strategy and antigen-specific CD8<sup>+</sup> T-cell responses induced by mRNA-NPs and mRNA-DCs after i.p. administration.** (A) Gating strategy for analysis of T-cell responses in adoptive transfer model. (B-G) Responses of transferred NY8.3 CD8<sup>+</sup> T cells to mRNA-NPs at a dose of 5  $\mu$ g mRNA/mouse (B-D) and mRNA-DCs at a dose of 2  $\mu$ g/1x10<sup>6</sup> electroporated DCs/mouse (E-G) were analyzed in CLN, ILN, PLN, MLN and spleen, and the results are depicted as representative dot plots (B,E), proliferation (percentage divided) (C,F) and CD25 upregulation (D,G). eGFP were used as a control in both modalities and the data are presented as mean  $\pm$  SD from at least three biological replicates. The significant differences indicated for several lymphoid tissues are relative to PLN in the antigen-treated group.

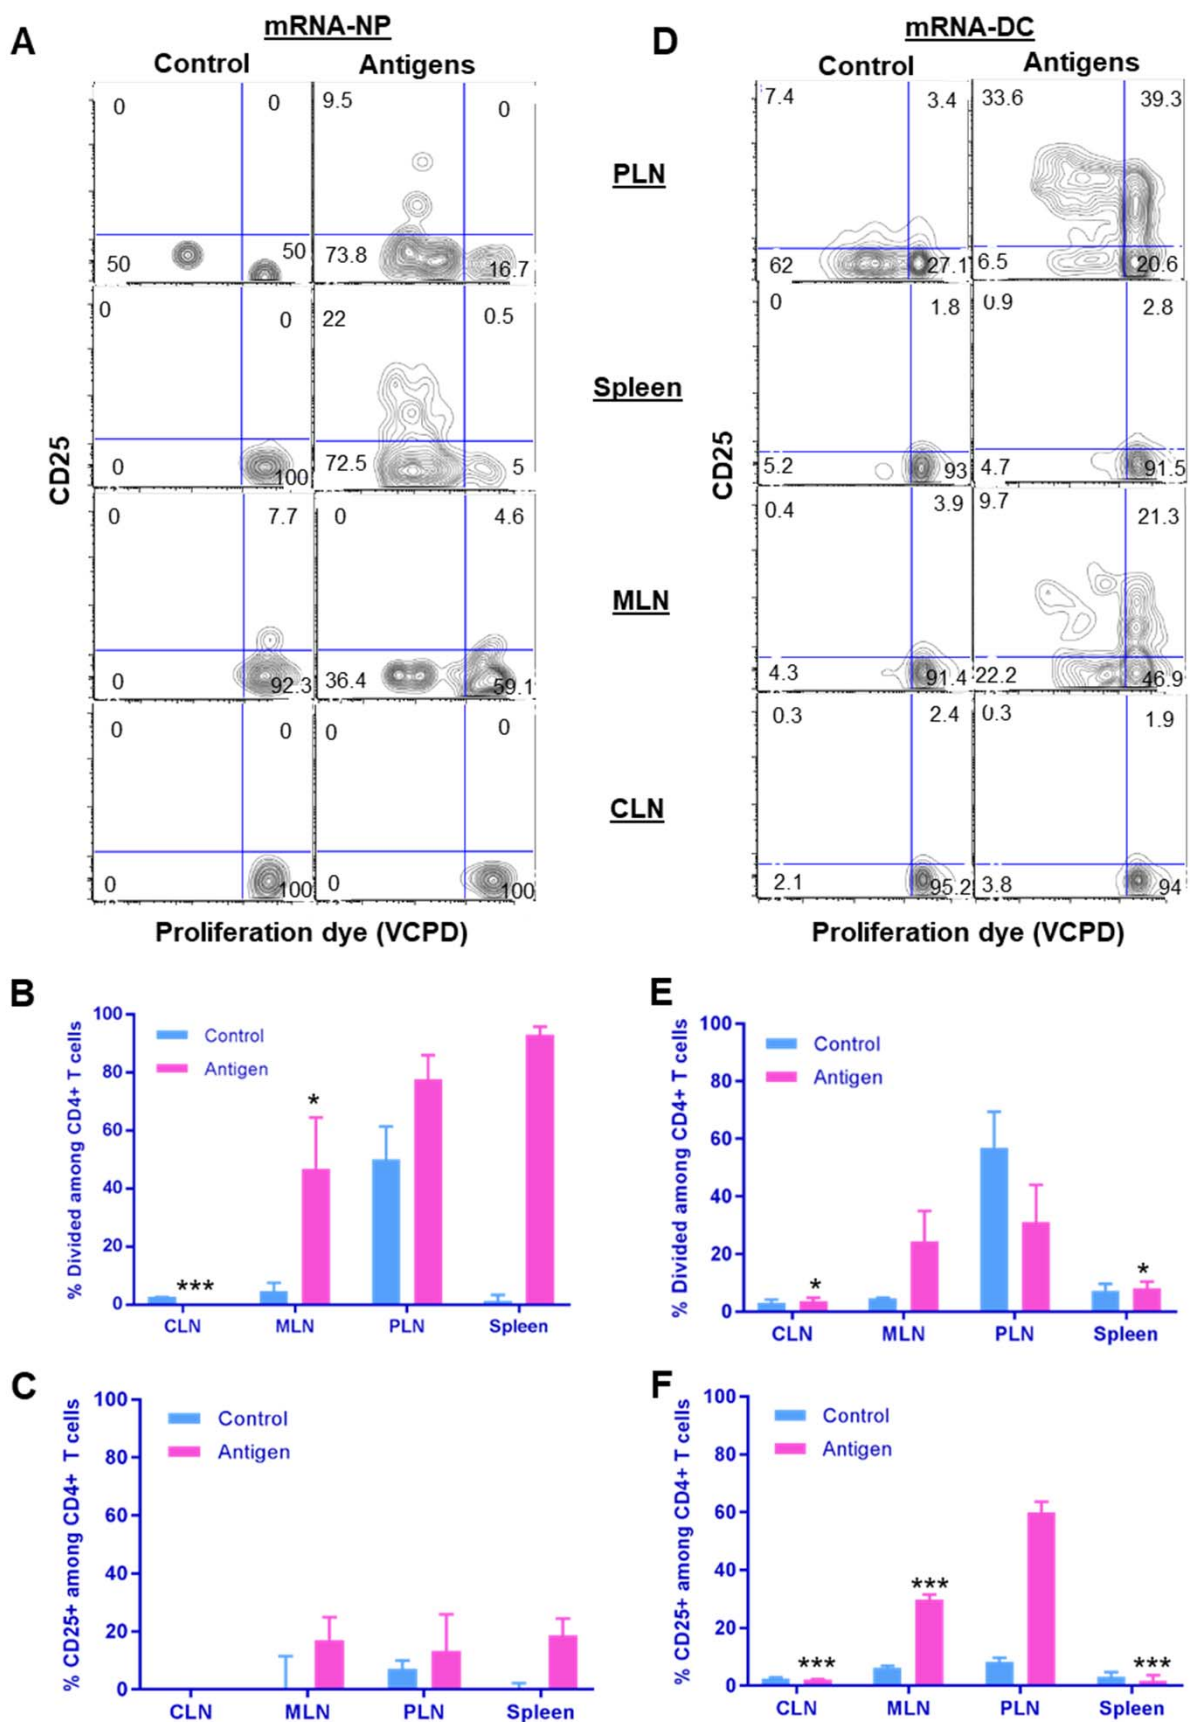

**Figure S6. Antigen-specific BDC12-4.1 T-cell response to mRNA-NPs or mRNA-DCs.** (A-F) Antigen-specific BDC12-4.1 T-cell responses to mRNA-NPs (A-C) and mRNA-DCs (D-F) in various lymphoid tissues after i.p. administration. mRNA-NPs and mRNA-DCs were used at a dose of 5  $\mu$ g mRNA/mouse and 0.6  $\mu$ g/  $1 \times 10^6$  electroporated DCs/mouse, respectively. eGFP was used as a control in both modalities and the data are presented as mean  $\pm$  SD from three biological replicates. The significant differences indicated for several lymphoid tissues are relative to PLN in the antigen-treated group.



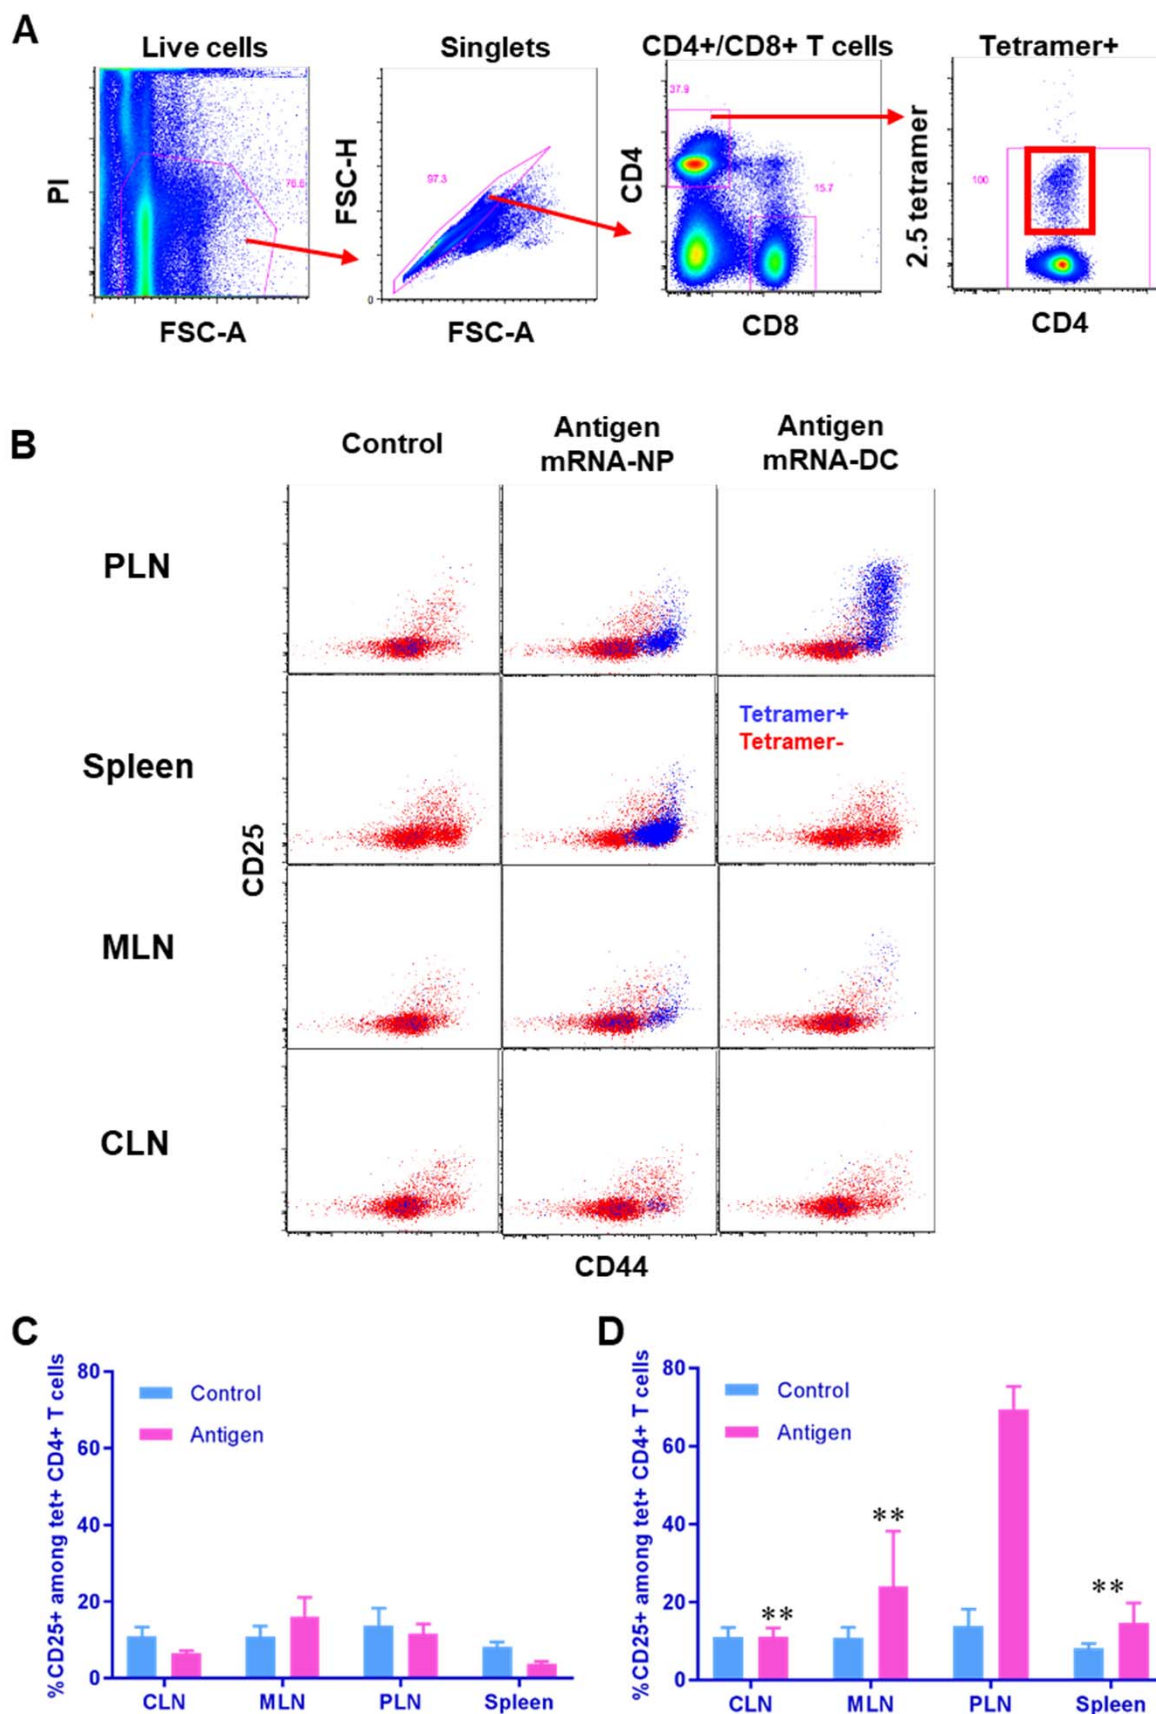

**Figure S7: Response of antigen-specific endogenous CD4<sup>+</sup> T cells to mRNA-NPs or mRNA-DCs.** (A) Gating strategy for analysis of endogenous antigen-specific T-cell responses using 2.5 MHC tetramers. (B-D) Endogenous antigen-specific CD4<sup>+</sup> T-cell responses to mRNA-NPs (B,C) and mRNA-DCs (B,D), in various lymphoid tissues 2.5 days after i.p. administration. Mice were injected with mRNA-NPs (5  $\mu$ g/mouse) expressing multiple epitopes (or mCherry as control) or 0.6  $\mu$ g/10<sup>6</sup> electroporated DCs/mouse. The bar graphs show the mean  $\pm$  SD from biological triplicates. The significant differences indicated for several lymphoid tissues are relative to PLN in the antigen-treated group.

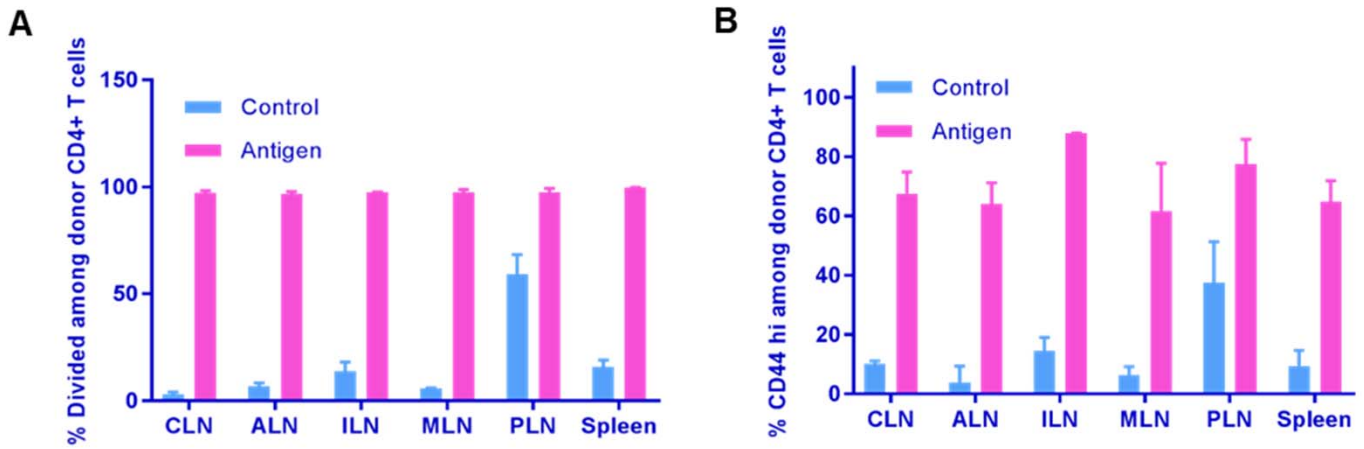

**Figure S8. Immune responses induced by mRNA-NPs after i.v. delivery.** Response of adoptively transferred BDC2.5 CD4<sup>+</sup> T cells as proliferation (**A**) and CD44 upregulation (**B**) induced by mRNA-NPs (“Antigen”) in various lymphoid tissues after i.v. injection. Mice in “Control” group were treated with saline. The data are presented as mean  $\pm$  SD from at least 3 mice per group.

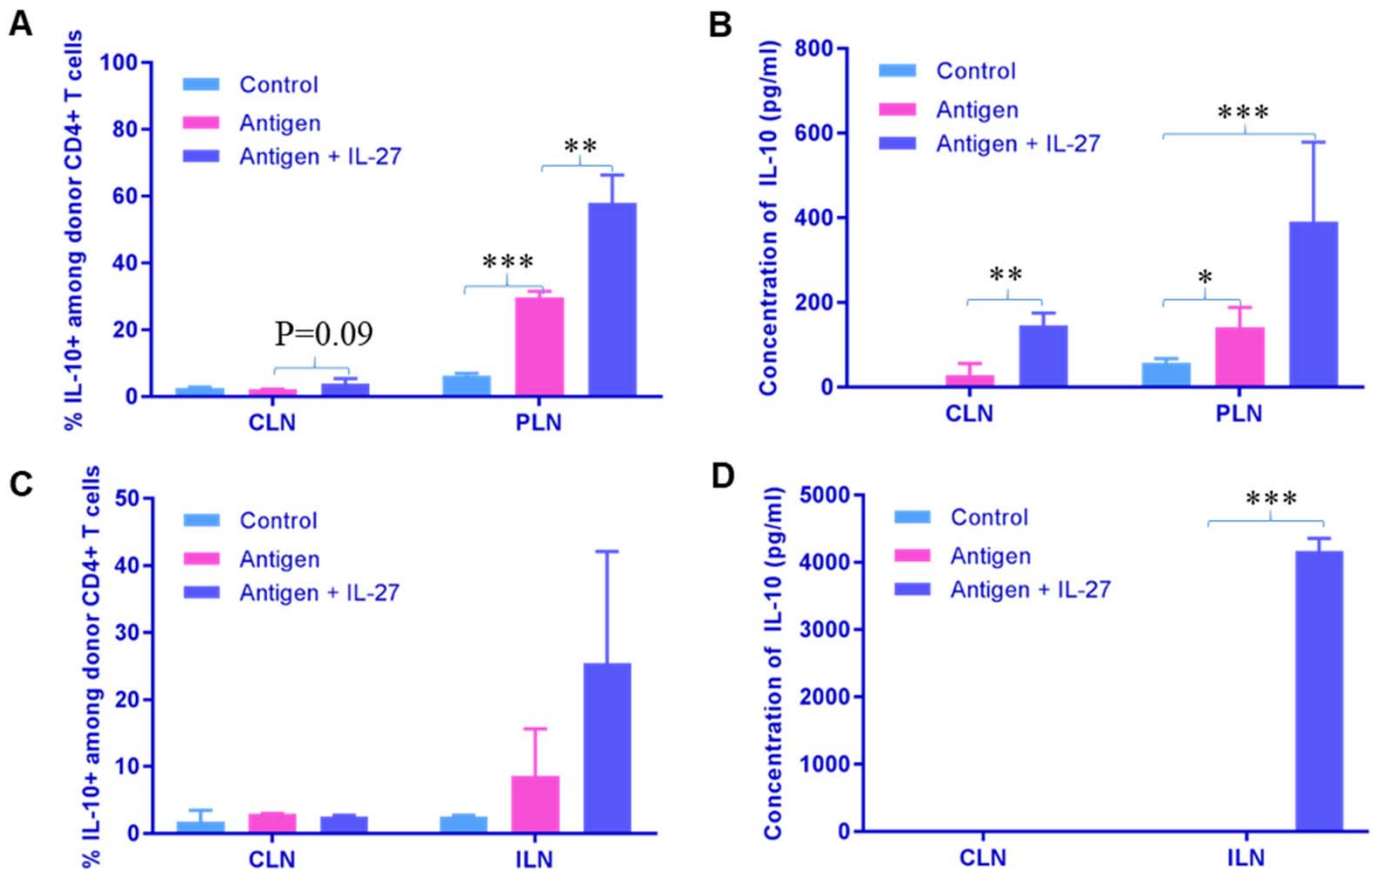

**Figure S9. Enhancement of IL-10 production with co-delivery of IL-27 in mRNA-NPs and mRNA-DCs.** IL-10 production in response to mRNA-NPs at a dose of 5  $\mu$ g of antigen-encoding mRNA co-delivered with 25  $\mu$ g of GFP mRNA (“Antigen”) or with 25  $\mu$ g of IL-27 mRNA (“Antigen + IL-27”) per mouse through the i.p. route (**A-B**) and to mRNA-DCs at a dose of 0.6  $\mu$ g antigen-encoding mRNA with 5.4  $\mu$ g of GFP mRNA (“Antigen”) or IL-27 mRNA (“Antigen + IL-27”) per  $1 \times 10^6$  electroporated DCs per mouse through the i.d. route (**C-D**). Measurement of IL-10 was performed by intracellular cytokine staining (**A,C**) or by ELISA after 3 days of culture ex vivo (**B,D**). Mice in “Control group” were treated with saline. The data are presented as mean  $\pm$  SD from at least 3 mice per group.
